# Supplementary material for: Assessing hydrodynamic space use of brown trout, Salmo trutta, in a complex flow environment: a return to first principles.
Source: Oxford University Press journal article supplement (doi:10.1242/jeb.134775), 2016-01-01
Supplement: jeb134775supp.pdf [file jeb134775supp.pdf]

**Table S1** Reynolds number ( $Re$ ), estimated vortex shedding frequency ( $f$ ), and wake wavelength ( $\lambda$ ) downstream of each cylinder ( $d$ ) used in an experimental study to investigate space use of brown trout, *Salmo trutta*, in a complex hydrodynamic environment.

| $d$<br>(mm) | $Re$  | $f$<br>(Hz) | $\lambda$<br>(m) |
|-------------|-------|-------------|------------------|
| 10          | 2699  | 13.67       | 0.03             |
| 20          | 5398  | 6.83        | 0.06             |
| 30          | 9097  | 4.56        | 0.09             |
| 40          | 10797 | 3.42        | 0.12             |
| 50          | 13496 | 2.73        | 0.15             |
| 60          | 16195 | 2.28        | 0.18             |
| 70          | 18894 | 1.95        | 0.21             |
| 80          | 21593 | 1.71        | 0.24             |
| 90          | 24292 | 1.52        | 0.27             |

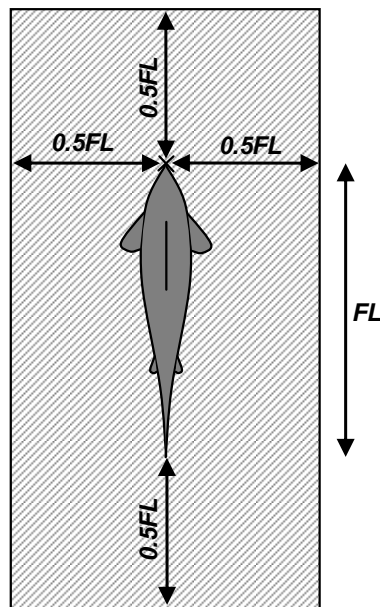

**Figure S1** The mechanosensory field of detection (MFoD) allocated to each fish and used to assess the area it sampled during hydrodynamic space use experiments in a large open channel flume.

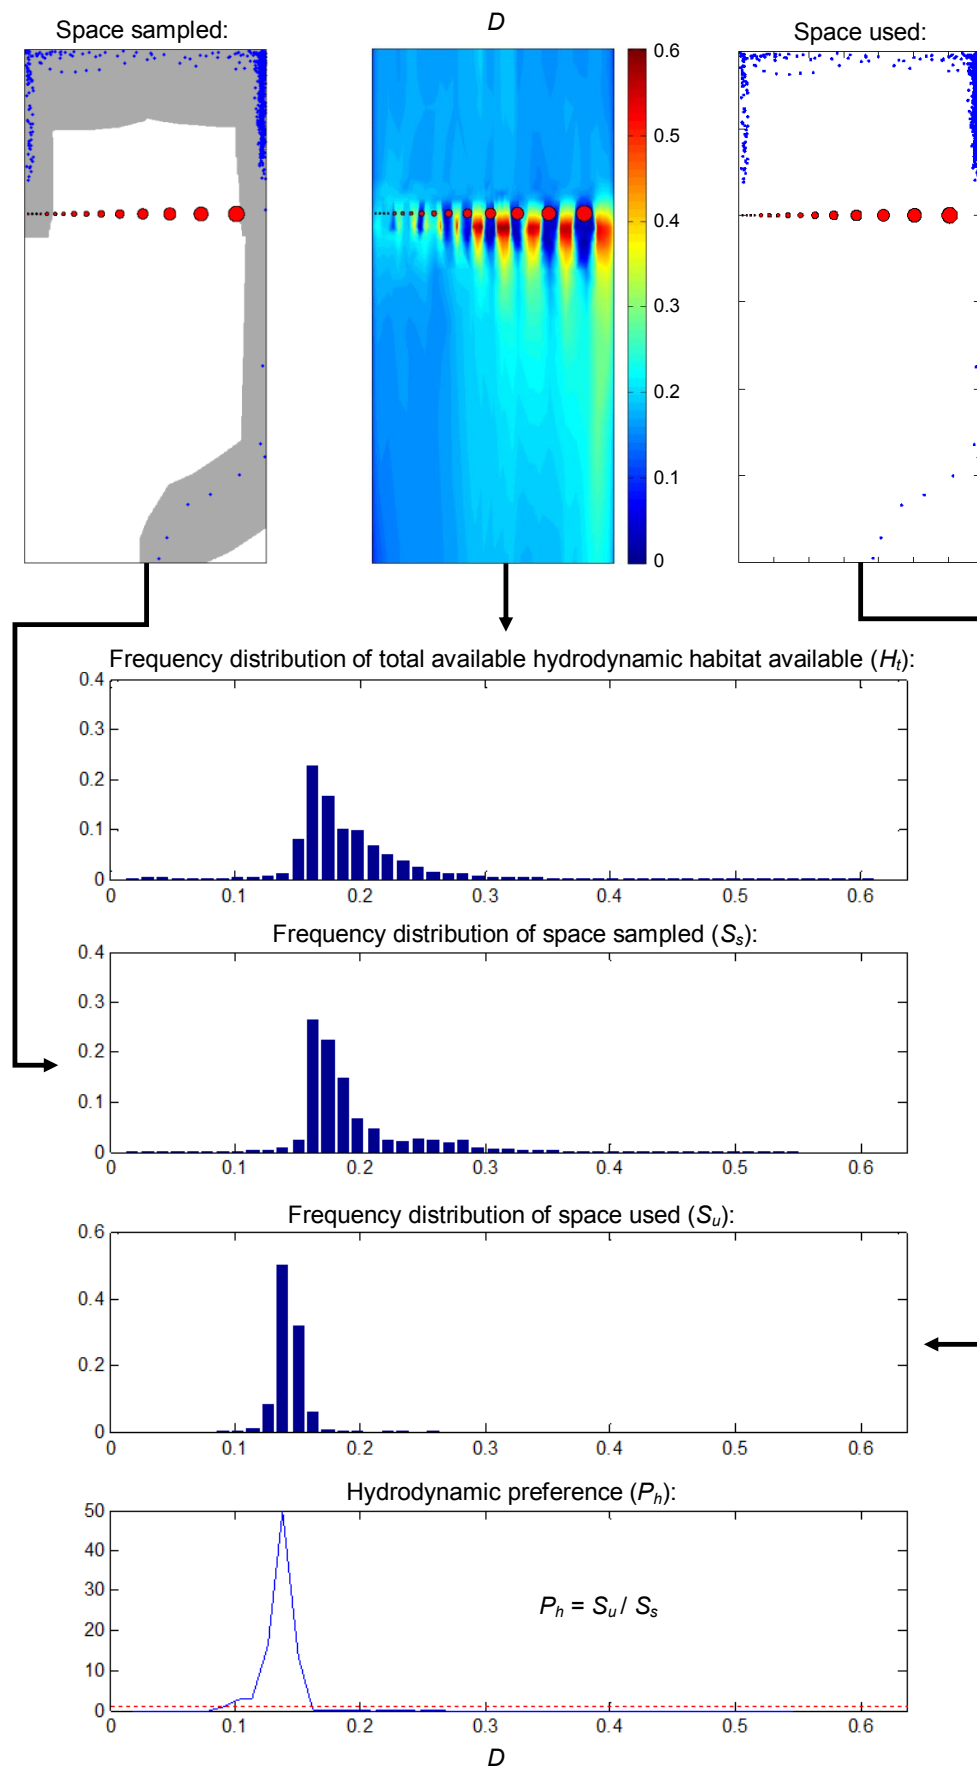

**Figure S2** Schematic representation of how preference was calculated. Example using data for a wild trout (FL: 223 mm) under treatment A (Trial 54, duration: 3600 seconds) for turbulent drag ( $D$ ). Schematic shows plots of the hydrodynamic habitat available (colour intensity plot of  $D$ ) (top middle), the area the fish sampled (grey area) (top left) and space used (blue dots – representing snout position each second) (top right) along with the corresponding frequency distributions of total available ( $H_t$ ), sampled ( $S_s$ ) and used ( $S_u$ ) turbulent drag ( $D$ ) during the trial. The resulting hydrodynamic preference ( $P_h$ ) for turbulent drag, where  $P_h = S_u/S_s$  (calculated for each bin of the  $S_u$  and  $S_s$  data), is shown in the bottom plot as a solid blue line. The red dashed line in the bottom plot is for reference purposes and represents an even distribution (i.e. preference = 1).

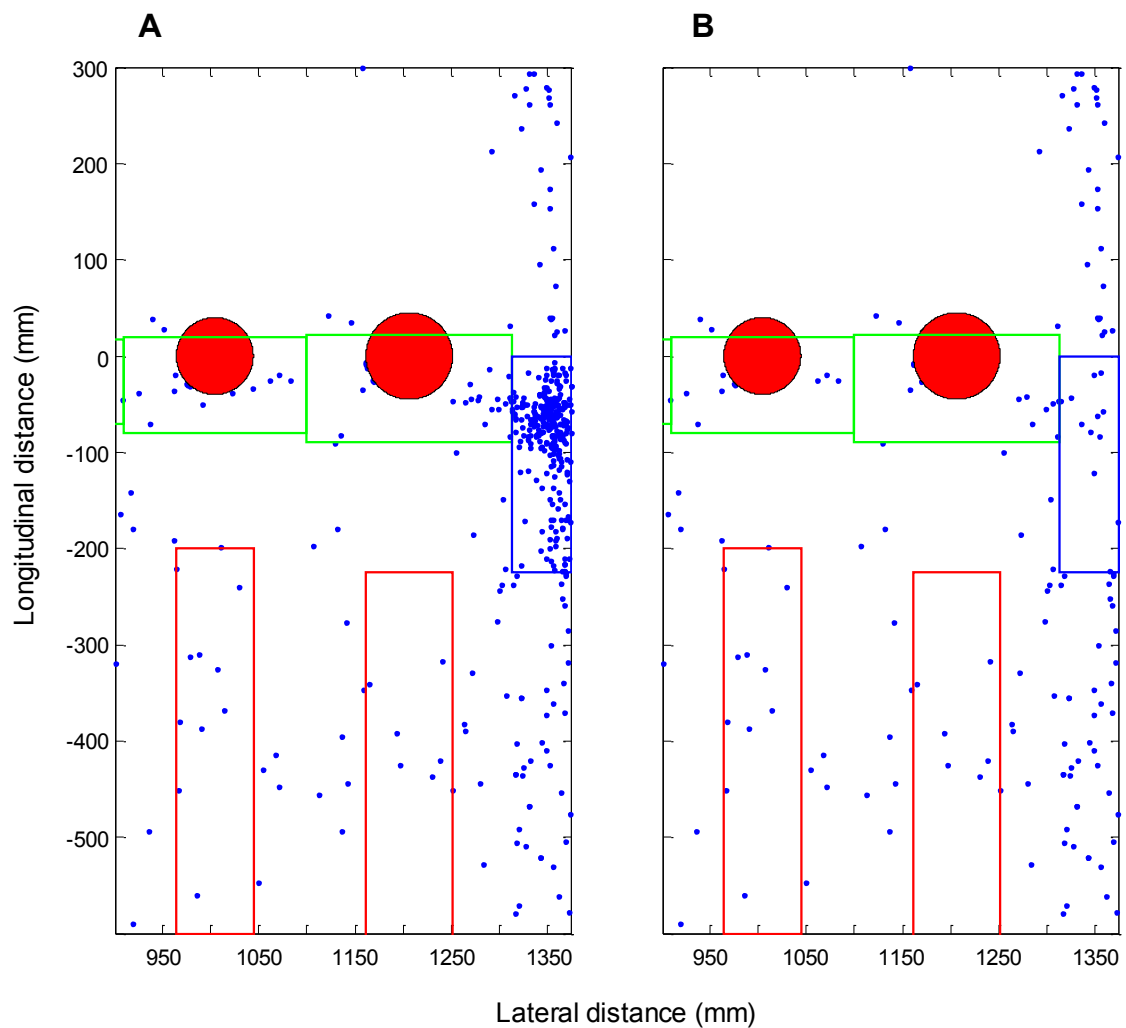

**Figure S3** Schematic representation of how excessive use of specialised behavioural zones (SBZs) was accounted for in the data. Example using data for a large hatchery trout (FL: 323 mm) under treatment A (Trial 4, duration: 3600 seconds) with a specific focus on the wall holding SBZ adjacent to the 90 mm cylinder (blue rectangle). A) Raw space use data – 272 instances of the trout being present in the wall holding zone. B) Modified space use data – If distribution had been even then the trout would have only used the zone 12 times. Hence 260 points (272 – 12) from within the SBZ were randomly removed. This was repeated for each SBZ and, therefore, the influence of fish preference for SBZ was removed from the final preference curves.

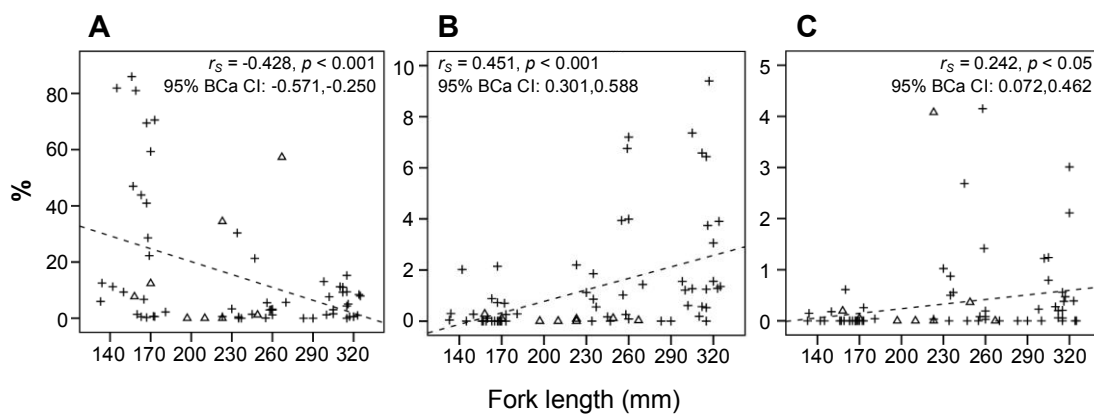

**Figure S4.** Relationship between percentage of a trial that hatchery (crosses,  $n = 58$ ) and wild (triangles,  $n = 8$ ) trout spent in the tail holding (A), Kármán gaiting (B) and bow riding (C) zones and fork length (FL) (mm) in treatment A and B combined. Dashed line represents the linear correlation. Text is the Pearson's correlation coefficient ( $r_s$ ) and significance level ( $p$ ) and the bootstrapped ( $n=2000$ ) bias corrected and accelerated (BCa) 95% confidence intervals (CI) of

$r_s$ .

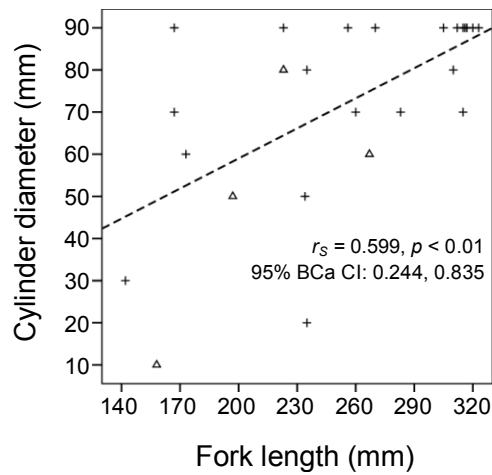

**Figure S5.** The relationship between trout fork length (mm) and the cylinder diameter (mm) of the entraining zone that hatchery (crosses,  $n = 21$ ) and wild (triangles,  $n = 4$ ) trout preferentially choose to utilise in treatment A and B combined. Dashed line represents the linear correlation. Text is the Pearson's correlation coefficient ( $r_s$ ) and significance level ( $p$ ) and the bootstrapped ( $n=2000$ ) bias corrected and accelerated (BCa) 95% confidence intervals (CI) of  $r_s$ .
